# Supplementary material for: Cecal bacterial communities in wild Japanese rock ptarmigans and captive Svalbard rock ptarmigans
Source: PubMed Central journal article supplement — J Vet Med Sci. 2015 Oct 15;78(2):251–7. doi: 10.1292/jvms.15-0313 (PMC4785114; doi:10.1292/jvms.15-0313), 2015-10-15
Supplement: jvms-78-251-s001.pdf [file jvms-78-251-s001.pdf]

**Table S1. OTUs and diversity indices from fecal samples from wild and captive rock ptarmigans**

| <b>Sampling site</b> | <b>Sample</b> | <b>Reads*</b> | <b>Total OTUs<sub>0.02</sub></b> | <b>Good's coverage</b> | <b>Simpson's diversity (1/D)</b> | <b>Shannon's diversity index</b> |
|----------------------|---------------|---------------|----------------------------------|------------------------|----------------------------------|----------------------------------|
| Wild                 | WL4           | 279,976       | 23,096                           | 0.74                   | 47.9                             | 10.0                             |
|                      | WL5           | 45,683        | 12,701                           | 0.76                   | 63.0                             | 9.4                              |
|                      | WL7           | 87,347        | 20,477                           | 0.77                   | 50.9                             | 9.7                              |
|                      | WL8           | 61,717        | 16,981                           | 0.76                   | 49.2                             | 9.6                              |
| Zoo                  | YL1           | 28,270        | 6,249                            | 0.77                   | 56.8                             | 9.0                              |
|                      | YL2           | 53,186        | 11,480                           | 0.82                   | 65.6                             | 9.2                              |
|                      | YL3           | 140,087       | 14,701                           | 0.84                   | 50.3                             | 9.1                              |
|                      | YL4           | 75,765        | 16,038                           | 0.83                   | 47.5                             | 9.3                              |
|                      | YL5           | 114,682       | 16,230                           | 0.82                   | 88.8                             | 9.6                              |

\* reads obtained after a series of cleaning steps

WL, Wild Japanese rock ptarmigans living in Tateyama Mountains.

YL, Captive bred Svalbard rock ptarmigans at the Preservation and Research Center, The City of Yokohama.

Details, see text.

**Table S2. Major OTUs (top 20 of the sequence reads) in fecal samples from the cecum of wild Japanese and captive Svalbard rock ptarmigan**

| OTU No.   | Closest GenBank relative<br>Closest GenBank cultured relative<br>Closest GenBank identified relative | Accession Number | % similarity | Reported source                                               | Bacterial group     |
|-----------|------------------------------------------------------------------------------------------------------|------------------|--------------|---------------------------------------------------------------|---------------------|
| WL-OTU-0  | Uncultured bacterium                                                                                 | FF077861         | 99           | Human fecal sample                                            | Actinobacteria      |
|           | <i>Olsenella</i> sp. 1183                                                                            | AB739700         | 99           |                                                               |                     |
|           | <i>Olsenella</i> <i>ali</i> strain DSM 7084                                                          | NR_074414        | 96           | Gingival crevice                                              |                     |
| WL-OTU-1  | Uncultured bacterium clone TuCw58                                                                    | DQ071541         | 99           | Ceca of Capercaillie ( <i>Tetrao urogallus</i> )              | Actinobacteria      |
|           | -                                                                                                    |                  |              |                                                               |                     |
| WL-OTU-2  | <i>Actinomyces cardiffensis</i> strain CCGU 44997                                                    | NR_025521        | 95           | Human clinical sources                                        | Synergistetes       |
|           | Uncultured bacterium clone TuCw37                                                                    | DQ071470         | 96           |                                                               |                     |
| WL-OTU-3  | <i>Cloacibacillus porcorum</i> strain CL-84                                                          | NR_109636        | 92           | Pig cecal mucosa                                              | Bacteroidetes       |
|           | Uncultured bacterium clone T2WK098                                                                   | HQ716462         | 90           | Pig feces                                                     |                     |
| WL-OTU-4  | <i>Bacteroides salanitronis</i> strain DSM 18170                                                     | NR_074616        | 88           | Cecum                                                         | Firmicutes          |
|           | Uncultured bacterium clone TuCw17                                                                    | DQ071445         | 98           | Ceca of Capercaillie ( <i>Tetrao urogallus</i> )              |                     |
| WL-OTU-5  | <i>Megasphaera cerevisiae</i> strain: JCM 6129                                                       | AB971803         | 93           |                                                               | Actinobacteria      |
|           | Uncultured bacterium clone Mol-108                                                                   | FJ031932         | 96           | Feline feces                                                  |                     |
| WL-OTU-6  | <i>Bifidobacterium pullorum</i> strain KCTC 3274                                                     | GU361830         | 96           |                                                               | Actinobacteria      |
|           | Uncultured bacterium clone TuCw25                                                                    | DQ071461         | 93           |                                                               |                     |
| WL-OTU-7  | <i>Slackia equolifaciens</i> strain DZE                                                              | NR_116295        | 93           | Human intestine                                               | Firmicutes          |
|           | Uncultured bacterium clone FS2_LC_059                                                                | KC804749         | 99           | Gut of flying squirrels                                       |                     |
| WL-OTU-8  | <i>Sporobacter termitidis</i> strain SYR                                                             | NR_044972        | 93           | Digestive tract of the wood-feeding termite                   | Tenericutes         |
|           | Uncultured bacterium clone SG_B552                                                                   | KF843208         | 89           | Pooled stool from school going group                          |                     |
| WL-OTU-9  | <i>Asteroleplasma anaerobium</i> strain 161                                                          | NR_044657        | 82           |                                                               | Firmicutes          |
|           | Uncultured bacterium clone TuCw57                                                                    | DQ071540         | 99           | Ceca of Capercaillie ( <i>Tetrao urogallus</i> )              |                     |
| WL-OTU-10 | <i>Roseburia hominis</i> strain A2-183                                                               | NR_074809        | 95           |                                                               | Firmicutes          |
|           | Uncultured bacterium clone AP15K.105                                                                 | AM406047         | 97           | Human faecal sample                                           |                     |
| WL-OTU-11 | <i>Dialister propionicifaciens</i> strain ADV 1053.03                                                | NR_043231        | 93           |                                                               | Bacteroidetes       |
|           | Uncultured bacterium clone WT8_B48                                                                   | EU009802         | 90           | Turkey cecum                                                  |                     |
| WL-OTU-12 | <i>Bacteroides helcogenes</i> strain: A4-47                                                          | AB219934         | 86           | Pig feces                                                     | Bacteroidetes       |
|           | Uncultured bacterium clone TuCw83                                                                    | DQ071514         | 97           | Ceca of Capercaillie ( <i>Tetrao urogallus</i> )              |                     |
| WL-OTU-13 | <i>Prevotella buccae</i> strain SEQ181                                                               | JN867257         | 88           | Human clinical isolate                                        | Firmicutes          |
|           | Uncultured bacterium clone cc_164                                                                    | GQ175467         | 99           | Ceca content of chicken gut                                   |                     |
| WL-OTU-14 | <i>Defluviitalea saccharophila</i> strain LIND6LT2                                                   | NR_117912        | 86           |                                                               | Firmicutes          |
|           | Uncultured bacterium clone TuC8                                                                      | DQ071485         | 99           | Ceca of Capercaillie ( <i>Tetrao urogallus</i> )              |                     |
| WL-OTU-15 | <i>Ruminococcus</i> sp. ID1                                                                          | AY960569         | 96           |                                                               | Firmicutes          |
|           | <i>Syntrophococcus sucronutans</i> strain S195                                                       | NR_036869        | 95           |                                                               |                     |
| WL-OTU-16 | <i>Bacteroides acidifaciens</i> strain A40                                                           | NR_028607        | 89           |                                                               | Bacteroidetes       |
|           | Uncultured bacterium clone cc_164                                                                    | GQ175467         | 99           | Ceca content of chicken gut                                   |                     |
| WL-OTU-17 | <i>Prevotella buccae</i> strain SEQ207                                                               | JN867282         | 82           | Human clinical isolate                                        | Deltaproteobacteria |
|           | Uncultured bacterium clone TuCc14                                                                    | DQ071477         | 99           | Ceca of Capercaillie ( <i>Tetrao urogallus</i> )              |                     |
| WL-OTU-18 | <i>Desulfovibrio fairfieldensis</i>                                                                  | U42221           | 90           |                                                               | Actinobacteria      |
|           | Uncultured bacterium clone B5_F31                                                                    | EF025268         | 100          | Intestine                                                     |                     |
| YL-OTU-0  | Bacterium ic1311                                                                                     | DQ057463         | 98           | Ileum; cecum                                                  | Firmicutes          |
|           | <i>Ruminococcus torques</i>                                                                          | AB910746         | 97           |                                                               |                     |
| YL-OTU-1  | <i>Bifidobacterium pullorum</i> strain KCTC 3274                                                     | GU361830         | 99           |                                                               | Actinobacteria      |
|           | Uncultured bacterium clone cc_11                                                                     | GQ175372         | 99           | Ceca content of chicken gut                                   |                     |
| YL-OTU-2  | <i>Faecalibacterium prausnitzii</i> strain 78_10294632078_070                                        | KJ957877         | 97           |                                                               | Firmicutes          |
|           | Uncultured bacterium clone 13AC_H08                                                                  | HM575014         | 100          | Cecal luminal content from chick reared                       |                     |
| YL-OTU-3  | Bacterium ic1297                                                                                     | DQ057460         | 98           | Ileum; cecum                                                  | Firmicutes          |
|           | <i>Ruminococcus torques</i>                                                                          | AB910746         | 97           |                                                               |                     |
| YL-OTU-4  | Uncultured bacterium clone 01b04                                                                     | GQ137202         | 100          | Swine waste feed for ASBR reactor                             | Firmicutes          |
|           | <i>Gemmiger formicilis</i> strain X2-56                                                              | NR_104846        | 99           |                                                               |                     |
| YL-OTU-5  | Uncultured bacterium clone 10_C3_18                                                                  | JN001301         | 100          | Mouse colon                                                   | Verrucomicrobia     |
|           | <i>Akkermansia muciniphila</i> strain ATCC BAA-835                                                   | NR_074436        | 100          |                                                               |                     |
| YL-OTU-6  | Uncultured bacterium clone G12_084                                                                   | JX889732         | 100          | Rabbit feces                                                  | Bacteroidetes       |
|           | Bacterium P1A4                                                                                       | KM043745         | 100          | Fecal sample                                                  |                     |
| YL-OTU-7  | <i>Bacteroides dorei</i> strain Z5                                                                   | KJ145327         | 100          | Fecal sample                                                  | Firmicutes          |
|           | Uncultured organism clone ELU0090-T14-S-NI_000372                                                    | HQ780914         | 99           | Gastrointestinal specimens                                    |                     |
| YL-OTU-8  | <i>Clostridium</i> sp. SL-2013-71                                                                    | HG326494         | 94           |                                                               | Firmicutes          |
|           | <i>Candidatus Soleaferrea massiliensis</i> AP7                                                       | JX101688         | 92           | Human stool                                                   |                     |
| YL-OTU-9  | Uncultured bacterium clone BY12                                                                      | DQ394300         | 100          | Broiler intestine                                             | Firmicutes          |
|           | <i>Butyrivibrio pulliacaecorum</i> strain 25-3                                                       | NR_044490        | 98           | Cecal content of a broiler chicken                            |                     |
| YL-OTU-10 | Uncultured organism clone ELU0112-T277-S-NI_000316                                                   | HQ788332         | 100          | Gastrointestinal specimens                                    | Bacteroidetes       |
|           | <i>Odoribacter lanicus</i> strain JCM 16069                                                          | NR_113074        | 99           |                                                               |                     |
| YL-OTU-11 | Uncultured bacterium clone cc_28                                                                     | GQ175385         | 100          | Ceca content of chicken gut                                   | Firmicutes          |
|           | <i>Clostridium hylemonae</i>                                                                         | AB910737         | 97           |                                                               |                     |
| YL-OTU-12 | Uncultured bacterium clone 1613Q1                                                                    | KM100395         | 100          | Fecal sample, Weddell seal ( <i>Leptonychotes weddellii</i> ) | Gammaproteobact     |
|           | <i>Escherichia coli</i> FAP1                                                                         | CP009578         | 100          | Feces                                                         |                     |
| YL-OTU-13 | Uncultured bacterium clone 21AC_G04                                                                  | HM575157         | 100          | Fresh pine shaving broiler litter                             | Firmicutes          |
|           | <i>Ruminococcus obeum</i>                                                                            | NR_119185        | 99           |                                                               |                     |
| YL-OTU-14 | Uncultured bacterium clone: R-C-H10.                                                                 | AB506364         | 100          | Feces of breeding pig fed                                     | Firmicutes          |
|           | <i>Sporobacter termitidis</i> strain SYR                                                             | NR_044972        | 94           | Wood-feeding termite                                          |                     |
| YL-OTU-15 | Uncultured organism clone ELU0160-T347-S-NIPCRAMgANa_000167                                          | HQ807920         | 100          | Gastrointestinal specimens                                    | Firmicutes          |
|           | Bacterium P2G6                                                                                       | KM043766         | 100          | Fecal sample                                                  |                     |
| YL-OTU-16 | <i>Intestinimonas butyriciproducens</i> strain SRB-521-5-I                                           | NR_118554        | 95           |                                                               | Firmicutes          |
|           | Uncultured bacterium clone V-22                                                                      | JQ248114         | 99           | Feces                                                         |                     |
| YL-OTU-17 | <i>Clostridium colinum</i> strain DSM 6011                                                           | NR_026151        | 94           |                                                               | Firmicutes          |
|           | Uncultured bacterium clone RL246_aai76h08                                                            | DQ793763         | 100          | Human feces                                                   |                     |
| YL-OTU-18 | <i>Anaerostipes butyraticus</i> strain JCM 17466                                                     | NR_113319        | 98           |                                                               | Firmicutes          |
|           | Uncultured bacterium clone 06AWH1A                                                                   | KJ422637         | 100          |                                                               |                     |
| YL-OTU-19 | <i>Clostridium perfringens</i> strain ATCC 13124                                                     | NR_121697        | 100          |                                                               | Firmicutes          |
|           | Uncultured bacterium clone AF07K.83.                                                                 | AM275478         | 99           | Human faecal sample                                           |                     |
| YL-OTU-20 | Bacterium MRG-1                                                                                      | HQ687764         | 96           | Intestine of Korean female                                    | Firmicutes          |
|           | <i>Candidatus Stoquefichus massiliensis</i> AP9                                                      | JX101690         | 93           | Human stool                                                   |                     |
| YL-OTU-21 | Uncultured bacterium clone 5AC_C05                                                                   | HM574804         | 100          | Ileal mucosa from chick reared on fresh pine shavings         | Firmicutes          |
|           | <i>Ruminococcus lactaris</i> strain ATCC 29176                                                       | NR_027579        | 97           |                                                               |                     |

WL, Wild Japanese rock ptarmigans living in Tateyama Mountains.  
YL, Captive bred Svalbard rock ptarmigans at the Preservation and Research Center, The City of Yokohama.  
Details, see text.

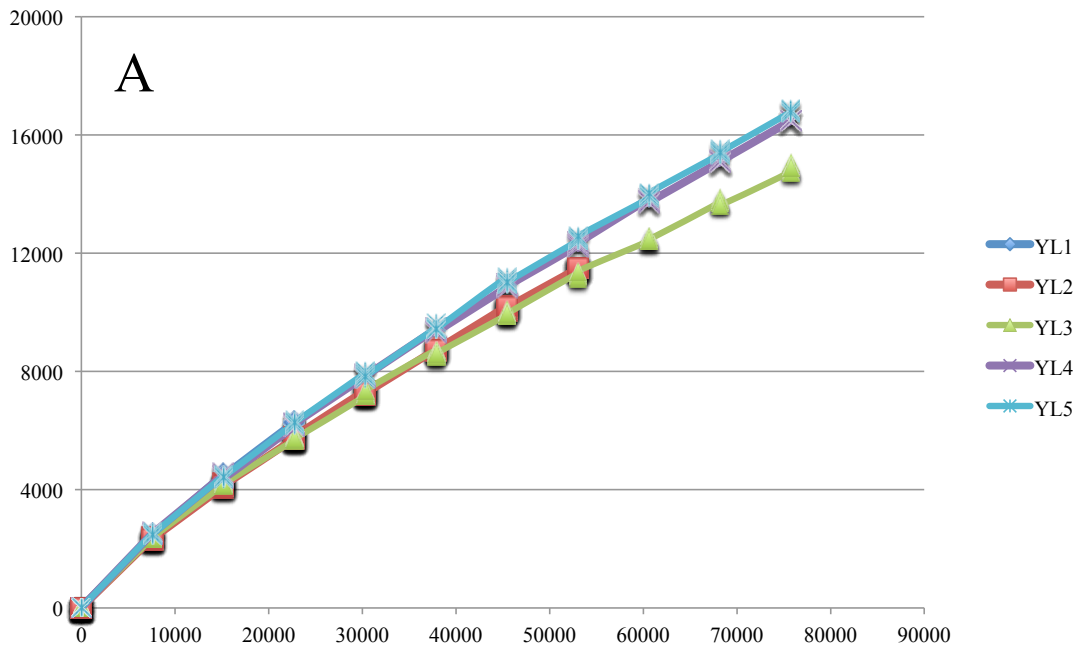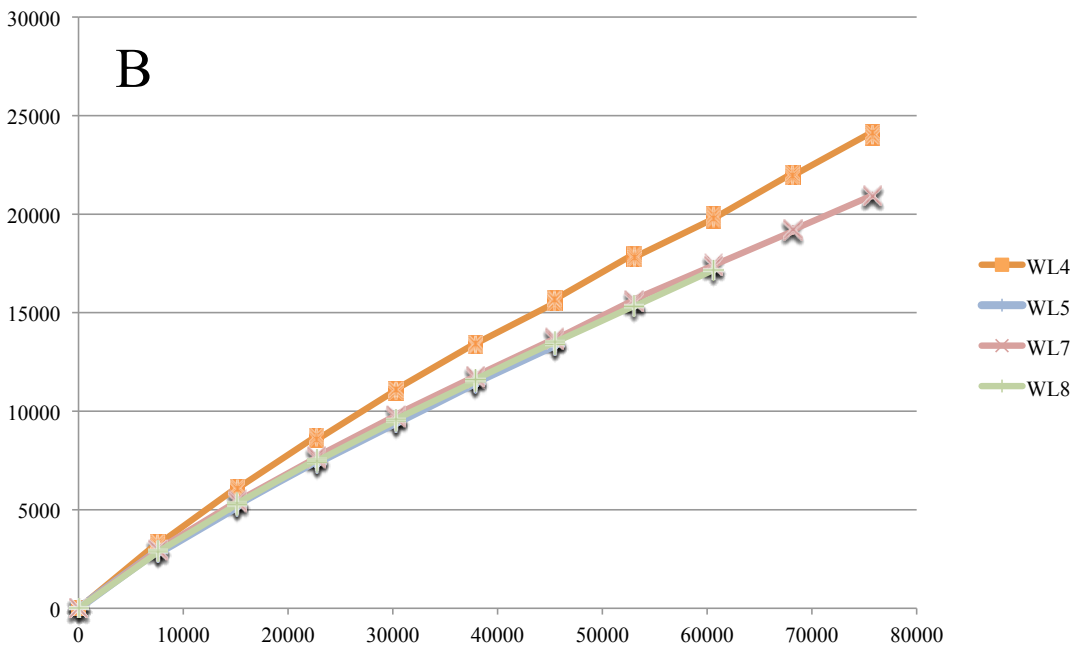

**Figure S1.** Rarefaction curves of obtained OTUs in each sample. A) captive Svalbard rock ptarmigans; B) wild Japanese rock ptarmigans. Details see Fig 1 and text.
